# Supplementary material
Source: Springer Nature journal article supplement (https://www.springermedizin.de/resource/supplementary/13561_2012_57_MOESM3_ESM.pdf/9687376)

Probability that observed value was above predicted value

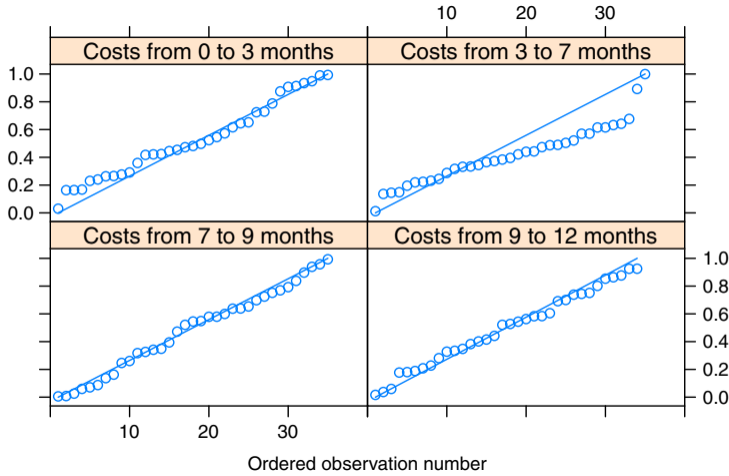

Supplement: MOESM3 [file 9687376]
